# Supplementary material for: Potential Predictive Value of TP53 and KRAS Mutation Status for Response to PD-1 Blockade Immunotherapy in Lung Adenocarcinoma
Source: Oxford University Press journal article supplement (doi:10.1158/1078-0432.ccr-16-2554), 2016-12-30
Supplement: 10780432ccr162554-sup-172992_1_supp_3759246_qhc00k.docx [file 10780432ccr162554-sup-172992_1_supp_3759246_qhc00k.docx]

**Supplementary Table S4.** Multivariate linear regression analysis of mutation count in patients stratified by smoking status on the base of validation set (GLCI).

| **Smoking status**  **Variables** |  | **Never smoking** | | |  | | **Current/Ever smoking** | |
| --- | --- | --- | --- | --- | --- | --- | --- | --- |
|  | **regression coefficients** | **p** |  | | **regression coefficients** | | **p** |
| **Gender (male vs female)a** |  | 0.189 (-0.154~0.533) | 0.966 |  | |  | |  |
| **Age (≥65 vs <65)** |  | 0.007 (-0.328~0.342) | 0.267 |  | | -0.029 (-0.296~0.238) | | 0.827 |
| **EGFR (mutation vs WT)** |  | -0.033 (-0.387~0.321) | 0.849 |  | | -0.357 (-0.627~-0.087) | | **0.011*** |
| **KRAS (mutation vs WT)** |  | 0.393 (0.043~0.743) | **0.029*** |  | | 0.031 (-0.235~0.298) | | 0.814 |
| **TP53 (mutation vs WT)** |  | 0.345 (0.010~0.680) | **0.044*** |  | | 0.459 (0.187~0.731) | | **0.001*** |
| **STK11 (mutation vs WT)b** |  |  |  |  | | -0.022 (-0.281~0.237) | | 0.866 |

Dependent Variable: **mutation count**

a no female patient in current/ever smoking subgroup; b no patient with STK11 mutation in never smoking subgroup. ***** indicated significant difference.
