# Supplementary material for: Potential Predictive Value of TP53 and KRAS Mutation Status for Response to PD-1 Blockade Immunotherapy in Lung Adenocarcinoma
Source: Oxford University Press journal article supplement (doi:10.1158/1078-0432.ccr-16-2554), 2016-12-30
Supplement: 10780432ccr162554-sup-172992_1_supp_3759248_6hc028.docx [file 10780432ccr162554-sup-172992_1_supp_3759248_6hc028.docx]

**Supplementary Figure S1.**

(**a**) Quantitative analysis of PD-L1 mRNA and protein expression compared *TP53* mutation with *TP53* wild type tumor. (**b**) Quantitative analysis of PD-L1 mRNA and protein expression compared *KRAS* mutation with *KRAS* wild type tumor. (**c**) Immunohistochemistry (IHC) analysis of PD-L1 expression (strong: ≥50% vs. weak: 1-49% vs. negative: <1%) based on *TP53* mutation status in a cohort of 93 lung adenocarcinoma. NS, no significant; mut, mutation; wt, wild type; *** P < 0.001, * P < 0.05

**Supplementary Figure S2.**

Analysis of GC>TA transversion in four groups compared common mutations (TP53/KRAS/EGFR/STK11) with corresponding wild type.
